# Supplementary material
Source: bioRxiv or medRxiv preprint supplement (https://www.biorxiv.org/highwire/filestream/2256/field_highwire_adjunct_files/22/008862-3.pdf)

Hoechst/SSEA1/NANOG

C4955

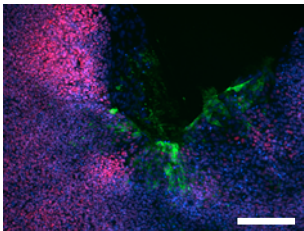

C40210

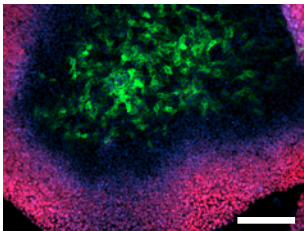

C40280

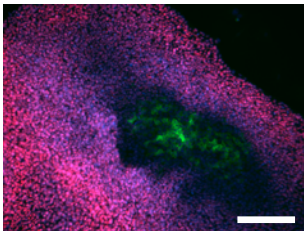

Supplement: Supplementary file [file 008862-3.pdf]
